# Supplementary material for: Effect of individualized weight management intervention on excessive gestational weight gain and perinatal outcomes: a randomized controlled trial
Source: PeerJ. 2022 Mar 8;10:e13067. doi: 10.7717/peerj.13067 (PMC8916027; doi:10.7717/peerj.13067)
Supplement: Supplemental Information 1 — 28 original variables [file peerj-10-13067-s001.xlsx]

## Sheet: coding 
a1	the intervention and control groups
a7	Age, year,
a8	Height, cm,
a9	Maternal prenatal weight, kg,
a10	Pre-pregnancy weight, kg,
a12	Maternal weight gain during pregnancy, kg,
a14	Pre-pregnancy BMI, kg/m2,
a15	gestational weeks
a16	Gravidity
a17	Parity
a19	Hospitalization, days,
a20	Cesarean
a21	Premature rupture of membrane
a22	Asphyxia neonatorum
a23	Premature
a24	Fetal macrosomia
a26	GDM
a27	Postpartum hemorrhage
a28	Fetal distress
a29	Eclampsia
a30	Gestational hypertension
a31	Anemia
a32	Thyroid diseases
a36	Uterine inertia
a37	Abnormal amniotic fluid
a42	Newborn birth weight, kg,
a44	Apgar Score at one minute
a45	Apgar Score at five minutes

## Sheet: dataset 
a1	a7	a8	a9	a10	a12	a14	a15	a16	a17	a19	a20	a21	a22	a23	a24	a26	a27	a28	a29	a30	a31	a32	a36	a37	a42	a44	a45
1	32	176	106	97	9	31.3146	28	4	3	8	1	0	0	0	0	1	0	0	0	0	0	0	0	0	3950	10	10
1	32	169	68	58	10	20.3074	25	1	1	5	2	1	0	0	0	1	0	0	0	0	0	1	0	0	3140	10	10
1	30	162	88	70	18	26.6728	20	1	1	7	1	0	0	0	0	0	0	1	0	0	0	0	0	0	3370	10	10
1	33	160	66.5	56	10.5	21.875	37	2	2	5	2	0	0	0	0	1	0	0	0	0	0	0	0	0	3780	10	10
1	34	167	66	51	15	18.2868	35	2	1	7	2	1	0	0	0	0	0	0	0	0	0	0	0	1	3660	10	10
1	31	156	68	55	13	22.6003	32	3	1	10	1	0	0	0	0	0	0	0	0	0	0	0	0	1	3860	10	10
1	35	160	87.5	58	29.5	22.6562	34	1	1	5	1	0	0	0	0	0	0	0	0	1	0	0	0	1	3150	10	10
1	31	165	88	68	20	24.977	30	1	1	4	1	0	0	0	1	0	0	0	0	0	0	0	0	0	4130	10	10
1	25	167	63.5	53	10.5	19.0039	22	2	2	5	1	0	0	0	0	0	0	0	0	0	0	0	0	0	3780	10	10
1	27	165	90	69	21	25.3444	36	1	1	8	2	0	0	0	0	1	1	0	1	0	0	0	0	0	3740	10	10
1	31	176	87	72	15	23.2438	32	3	2	5	2	0	0	0	0	0	0	0	0	0	0	0	0	1	3980	10	10
1	30	168	66	53	13	18.7783	21	1	1	3	1	1	0	0	0	0	0	0	0	0	0	0	0	0	3160	10	10
1	30	170	61.5	54	7.5	18.6851	28	6	2	6	2	0	0	0	0	0	0	0	0	0	0	0	0	0	3420	10	10
1	29	160	75	55	20	21.4844	25	3	1	3	1	1	0	0	0	0	0	0	0	0	0	1	0	0	4090	10	10
1	27	171	79	64	15	21.8871	28	1	1	4	1	1	0	0	0	0	0	0	0	0	0	0	0	0	3400	10	10
1	28	170	79	60	19	20.7612	33	1	1	5	1	1	0	0	0	1	0	0	0	0	0	0	0	0	3450	10	10
1	28	162	73	57	16	21.7193	32	1	1	5	1	1	0	0	0	1	1	0	0	0	0	0	0	0	3250	10	10
1	30	164	100	74	26	27.5134	28	1	1	9	1	0	0	0	0	0	0	0	0	0	0	1	0	0	2690	10	10
1	42	158	79	55	24	22.0317	34	1	1	6	1	0	0	0	0	0	1	0	0	0	0	0	0	1	2970	10	10
1	32	164	86	69	17	25.6544	39	1	1	4	1	0	0	0	0	0	0	0	0	0	0	0	0	0	3850	10	10
1	28	160	74	55	19	21.4844	34	2	2	5	2	0	0	0	0	1	0	0	0	0	0	0	0	0	3670	10	10
1	29	158	59	42	17	16.8242	27	3	1	5	1	0	0	0	0	0	0	1	0	0	0	1	0	1	3730	10	10
1	35	172	75	60	15	20.2812	30	1	1	3	2	0	0	0	0	1	1	0	1	0	0	0	0	0	3740	10	10
1	23	160	78	52.5	25.5	20.5078	34	1	1	6	1	0	0	0	0	1	1	1	0	0	0	0	0	0	3700	10	10
1	30	168	95	75	20	26.5731	36	2	1	5	1	0	0	0	0	0	1	0	0	0	0	0	0	0	3530	10	10
1	29	165	72	60	12	22.0386	28	1	1	7	2	0	0	0	1	0	0	0	0	0	0	1	0	0	4050	10	10
1	32	162	64	51	13	19.433	24	1	1	3	1	0	0	0	0	0	0	0	0	0	0	1	0	0	3410	10	10
1	29	160	71	55	16	21.4844	28	1	1	6	1	0	0	0	0	0	0	0	0	0	0	0	0	0	3410	10	10
1	29	161	70	50	20	19.2894	28	2	2	5	1	0	0	0	0	0	1	0	0	0	0	0	0	1	3080	10	10
1	29	170	94.5	72.5	22	25.0865	24	1	1	5	1	1	0	0	0	0	0	0	0	0	0	0	0	0	3610	10	10
1	32	166	84	67	17	24.3141	26	3	2	3	1	0	0	0	1	0	1	0	0	0	0	0	0	0	4170	10	10
1	29	160	86	70	16	27.3438	30	2	2	5	1	1	0	0	0	0	0	0	0	0	0	1	0	0	3830	10	10
1	30	160	71	53	18	20.7031	31	3	2	5	1	1	0	0	0	0	0	0	0	0	0	0	0	0	3440	10	10
1	26	160	87	60	27	23.4375	21	3	2	5	2	0	0	0	0	0	0	0	0	0	0	0	0	0	3150	10	10
1	32	165	76	60	16	22.0386	22	2	1	2	2	0	0	0	0	0	0	1	0	0	0	0	0	0	3250	10	10
1	23	162	70	52.5	17.5	20.0046	38	3	2	5	1	0	0	0	0	0	0	0	0	0	0	1	0	0	3560	10	10
1	32	160	67	54	13	21.0938	32	1	1	5	1	0	0	0	0	0	0	0	0	0	0	0	0	0	2810	10	10
1	29	160	72	65	7	25.3906	29	1	1	4	2	0	0	0	0	0	0	1	0	0	0	1	0	0	3500	10	10
1	28	167	74	56	18	20.0796	38	2	1	7	1	0	0	0	0	0	0	0	0	0	0	0	0	1	3270	10	10
1	28	155	65	45	20	18.7305	24	1	1	7	1	0	0	0	0	0	0	0	0	0	0	0	0	0	3490	10	10
1	34	160	76	50	26	19.5312	17	1	1	9	1	1	0	0	0	0	0	0	0	0	0	0	0	0	3050	10	10
1	35	74	60	45	15	82.1768	25	3	1	1	1	0	0	0	0	1	1	0	0	0	0	0	0	0	3730	10	10
1	25	165	61	52	9	19.1001	20	2	1	3	2	0	0	0	0	1	0	0	0	0	0	0	0	0	3440	10	10
1	31	162	71	55	16	20.9572	29	1	1	4	2	0	0	0	0	0	0	0	0	0	0	0	0	0	3080	10	10
1	36	163	74	42	32	15.8079	16	2	1	2	1	0	0	0	0	1	0	0	0	0	0	0	0	0	3020	10	10
1	35	155	67.5	57	10.5	23.7253	25	1	1	5	1	0	0	0	0	1	0	0	0	0	0	0	0	0	3550	10	10
1	29	165	62.5	50	12.5	18.3655	32	1	1	4	1	0	0	0	0	1	0	0	0	1	1	1	0	0	3800	10	10
1	28	164	67	53	14	19.7055	31	3	2	3	1	0	0	0	0	1	0	0	0	0	0	0	0	0	3230	10	10
1	29	163	72	59.5	12.5	22.3945	31	2	1	3	1	0	0	0	0	0	0	0	0	0	1	0	0	0	3670	10	10
1	38	167	80	65	15	23.3067	14	3	2	5	2	0	0	0	0	0	1	0	0	0	0	0	0	0	3600	10	10
1	35	160	73.5	48	25.5	18.75	6	2	1	5	1	0	0	0	0	0	0	0	0	0	0	0	0	0	3190	10	10
1	23	163	64	48	16	18.0662	25	3	2	2	2	0	0	0	0	0	0	0	0	0	0	0	0	0	3960	10	10
1	35	155	76	58	18	24.1415	31	1	1	5	2	1	0	0	0	0	1	0	0	0	0	0	0	1	3610	10	10
1	29	162	58	50	8	19.052	25	1	1	5	2	0	0	0	0	1	0	0	0	0	0	0	0	0	3400	10	10
1	36	164	90	78.5	11.5	29.1865	25	1	1	3	2	0	0	0	0	0	0	0	0	0	0	0	0	0	3650	10	10
1	33	163	68	54	14	20.3244	26	1	1	3	1	0	0	0	0	0	0	0	0	0	0	1	0	0	3060	10	10
1	33	162	82	64	18	24.3865	12	2	1	4	1	0	0	0	0	0	0	0	0	0	0	0	0	0	3190	10	10
1	29	168	82.5	67	15.5	23.7387	29	1	1	4	1	0	0	0	0	0	1	0	0	0	1	0	0	1	3440	10	10
1	30	160	66.5	54	12.5	21.0938	24	1	1	4	1	1	0	0	0	0	0	0	0	0	0	0	0	1	3240	10	10
1	29	160	58	50	8	19.5312	26	1	1	4	1	0	0	0	0	1	0	0	0	0	0	0	0	0	3260	10	10
1	30	162	65	58	7	22.1003	20	1	1	6	1	0	0	0	0	0	0	0	0	0	0	0	0	0	3090	10	10
1	28	166	70	60	10	21.7738	38	2	2	5	2	0	0	0	0	0	0	0	0	0	0	0	0	0	3800	10	10
1	34	165	83	68	15	24.977	34	1	1	6	1	0	0	0	0	0	0	0	0	1	0	0	0	0	2680	10	10
1	31	168	87	60	27	21.2585	23	3	2	6	1	0	0	0	0	1	0	1	0	0	0	0	0	0	3480	10	10
1	29	165	82	61	21	22.4059	22	6	2	7	2	0	0	1	0	1	0	0	0	0	1	0	0	0	3370	10	10
1	34	164.5	65	54	11	19.9555	25	1	1	6	1	1	0	0	0	0	0	0	0	0	0	0	0	0	3400	10	10
1	38	154	67	59	8	24.8777	32	2	2	5	2	0	0	0	0	1	0	0	0	0	0	0	0	0	3340	10	10
1	28	160	78	58	20	22.6562	29	1	1	5	2	0	0	1	0	0	1	0	1	1	0	0	0	0	2260	10	10
1	24	168	80	61	19	21.6128	30	3	2	4	1	0	0	0	0	1	1	0	0	0	0	0	0	0	3880	10	10
1	30	160	70	58	12	22.6562	7	2	1	8	1	1	0	0	0	0	0	0	0	0	0	0	0	0	2870	10	10
1	23	160	60	43	17	16.7969	28	2	1	4	1	0	1	0	0	1	0	0	0	0	0	0	0	0	3740	6	10
1	28	160	87	73	14	28.5156	28	1	1	5	1	0	0	0	1	1	1	0	0	1	0	1	0	0	4410	10	10
1	29	160	68	49	19	19.1406	26	1	1	6	2	0	0	0	0	0	0	0	0	0	0	0	0	0	3690	10	10
1	36	164	77.5	61	16.5	22.68	28	1	1	5	1	0	0	0	0	0	1	0	0	0	0	0	0	0	3280	10	10
1	34	155	60	50	10	20.8117	32	2	2	4	1	0	0	0	0	1	0	0	0	0	0	1	0	0	4140	10	10
1	39	160	92	67	25	26.1719	30	3	2	7	2	0	0	0	0	1	0	0	0	1	0	0	0	0	3410	10	10
1	34	168	74	56	18	19.8413	34	4	2	2	1	0	0	0	0	0	0	0	0	0	0	0	0	0	3690	10	10
1	33	156	69	48	21	19.7239	28	3	1	7	2	0	0	0	0	0	0	0	0	0	0	1	0	0	3640	10	10
1	24	163	58	44	14	16.5607	24	2	1	5	2	1	0	0	0	0	0	0	0	0	0	1	0	0	2730	10	10
1	30	168	70	45	25	15.9439	27	1	1	5	2	0	0	0	0	1	0	0	0	0	0	0	0	0	3570	10	10
1	26	160	78	59	19	23.0469	26	1	1	7	2	1	0	0	0	0	0	0	0	0	0	0	0	0	3440	10	10
1	32	163	76	55	21	20.7008	25	4	1	6	1	0	0	0	0	0	0	0	0	0	0	0	0	1	3500	10	10
1	26	155	67	50	17	20.8117	30	2	2	6	1	0	0	0	0	0	0	0	0	0	0	0	0	0	3220	10	10
1	26	163	96	61	35	22.9591	32	3	1	5	1	0	0	0	1	0	0	0	0	0	0	0	0	0	4150	10	10
1	34	162	86.5	66	20.5	25.1486	20	1	1	7	2	0	0	0	0	0	1	0	0	0	0	0	0	0	3300	10	10
1	27	154	66	52	14	21.9261	28	1	1	5	1	0	0	0	0	0	0	0	0	0	0	1	0	0	3490	8	10
1	27	160	69	56	13	21.875	25	4	1	5	1	1	0	0	0	0	0	0	0	0	0	0	0	0	3330	10	10
1	29	158	75	60	15	24.0346	28	3	2	10	2	0	0	0	0	1	0	0	0	0	0	0	0	0	3050	10	10
1	29	163	73	62	11	23.3355	22	1	1	5	1	0	0	0	0	0	0	1	0	0	0	0	0	0	3490	10	10
1	34	165	72	60	12	22.0386	32	2	2	3	1	0	0	1	0	0	1	0	0	0	0	0	0	0	2590	10	10
1	22	165	75	48	27	17.6309	30	4	2	7	1	0	0	0	0	0	0	0	0	0	0	0	0	0	3510	10	10
1	36	162	62	52	10	19.8141	30	1	1	7	2	0	0	0	0	0	1	0	0	0	0	0	0	0	3480	10	10
1	25	161	80	53	27	20.4467	28	1	1	12	2	0	0	0	1	1	1	0	0	0	0	0	0	0	4000	10	10
1	25	166	84	71	13	25.7657	28	1	1	6	2	0	0	0	0	0	0	0	0	0	0	0	0	0	3220	10	10
1	28	164	92	80	12	29.7442	28	1	1	8	2	0	0	0	1	0	0	0	0	0	0	1	0	0	4140	10	10
1	38	168	71.5	60	11.5	21.2585	32	2	2	5	1	0	0	0	0	0	0	0	0	0	0	1	0	0	3800	10	10
1	31	165	65	53	12	19.4674	24	1	1	5	1	0	0	0	0	1	0	0	0	0	0	0	0	0	3210	10	10
1	31	162	68	53	15	20.1951	24	2	1	6	2	0	0	0	0	1	0	0	0	0	0	0	0	0	3760	10	10
1	30	168	60	50	10	17.7154	22	1	1	5	1	0	0	0	0	0	0	0	0	0	0	0	0	0	3180	10	10
1	29	165	78	57	21	20.9366	28	1	1	3	1	0	0	0	0	0	0	0	0	0	0	0	0	0	3040	10	10
1	24	160	77	60	17	23.4375	30	2	2	4	2	1	0	0	0	0	0	0	0	0	0	1	0	0	2840	10	10
1	29	163	75	60	15	22.5827	30	1	1	3	1	1	0	0	0	0	0	0	0	0	0	0	0	0	3600	10	10
1	30	150	81	77.5	3.5	34.4444	12	1	1	5	1	0	0	0	0	0	0	0	0	0	0	0	0	0	3400	10	10
1	26	160	66	48	18	18.75	30	4	2	3	2	0	0	0	0	1	0	0	0	0	0	0	0	0	3450	10	10
1	30	162	62	53	9	20.1951	33	3	2	5	1	0	0	0	0	0	0	0	0	0	0	0	0	0	3000	10	10
1	40	165	65	48.5	16.5	17.8145	29	2	2	3	1	0	0	0	0	1	0	0	0	0	0	0	0	0	3460	10	10
1	23	167	78	69	9	24.7409	25	2	2	6	2	0	0	0	0	0	0	0	0	0	0	0	0	0	3250	10	10
1	26	162	68	49	19	18.6709	33	1	1	5	1	0	0	0	0	0	1	0	0	0	0	0	0	0	3020	10	10
1	34	169	88.5	75.5	13	26.4346	24	1	1	9	1	0	0	0	0	0	0	0	0	0	0	0	0	0	2730	10	10
1	28	168	101	84	17	29.7619	18	1	1	3	2	1	0	0	0	1	0	1	0	0	0	0	0	0	2430	10	10
1	32	157	52	41	11	16.6335	24	2	1	3	1	0	0	0	0	0	0	0	0	0	0	0	0	0	3430	10	10
1	37	160	72	53	19	20.7031	8	1	1	5	1	0	0	0	0	0	1	0	0	0	0	0	0	0	3290	10	10
1	35	165	72	60	12	22.0386	26	3	1	6	1	1	0	0	0	0	0	0	0	0	0	0	0	0	3370	10	10
1	20	172	74	54	20	18.2531	25	1	1	3	1	1	0	1	0	1	0	0	0	0	0	0	0	0	2900	10	10
1	26	168	70	50	20	17.7154	36	2	2	4	2	0	0	0	0	1	0	0	0	0	0	0	0	0	3060	10	10
1	28	162	66.5	50	16.5	19.052	36	2	1	3	1	0	0	0	0	1	0	0	0	0	0	0	0	0	3200	10	10
1	24	158	69	50	19	20.0288	30	2	1	4	1	0	0	0	0	0	0	0	1	0	0	0	0	0	3160	10	10
1	29	160	73	60	13	23.4375	17	2	2	7	2	0	0	0	0	1	0	0	0	0	0	0	0	0	3750	10	10
1	28	160	82	69	13	26.9531	27	2	1	6	1	0	0	0	0	1	0	1	0	0	0	0	0	0	3810	10	10
1	32	168	72	62	10	21.9671	25	3	2	6	1	0	0	0	0	1	0	0	0	0	0	0	0	0	2910	10	10
1	28	160	72	57	15	22.2656	35	2	1	5	2	0	0	0	0	0	0	0	0	0	0	0	1	0	2920	10	10
1	31	170	76	63	13	21.7993	24	1	1	2	1	0	0	0	0	0	1	1	0	0	0	0	0	0	3470	10	10
1	27	165	99	78	21	28.6501	34	1	1	4	1	1	0	0	0	1	0	0	0	0	0	0	0	0	3300	10	10
1	33	168	70	53	17	18.7783	24	2	1	3	1	1	0	0	0	0	0	1	0	0	0	0	0	0	3490	10	10
1	37	163	75	57	18	21.4536	7	2	2	4	1	0	0	0	0	0	0	0	0	0	0	1	0	1	3890	10	10
1	31	156	102	82	20	33.6949	30	2	1	8	1	0	0	0	0	1	0	0	0	0	0	0	0	0	3710	10	10
1	29	165	70	53	17	19.4674	34	3	2	5	2	0	0	0	1	1	0	0	0	0	0	1	0	0	4360	10	10
1	34	162	54	48	6	18.2899	27	1	1	4	1	1	0	0	0	0	0	0	0	0	0	0	0	0	3710	10	10
1	21	163	66	60	6	22.5827	34	2	1	5	2	0	0	1	0	0	0	0	0	0	0	0	0	0	2550	9	10
1	28	158	78	72	6	28.8415	8	2	1	5	2	0	0	0	0	0	0	1	0	0	0	1	0	0	3000	10	10
1	26	166	97	80	17	29.0318	17	3	2	5	1	0	0	0	0	1	1	0	0	0	0	0	0	0	3200	10	10
1	27	173	95	72	23	24.0569	37	3	2	5	2	0	0	0	0	1	0	0	0	0	0	0	0	0	3370	10	10
1	33	155	85	70	15	29.1363	25	1	1	5	1	0	0	0	0	1	0	0	0	0	0	0	0	0	3300	10	10
1	25	161	61	50	11	19.2894	20	1	1	6	1	0	0	0	0	0	1	0	0	0	0	1	0	1	3500	10	10
1	27	160	80.5	60	20.5	23.4375	28	1	1	5	1	0	0	0	0	0	0	1	0	0	0	1	0	0	3280	10	10
1	39	160	66.5	50	16.5	19.5312	24	1	1	2	1	1	0	0	0	0	0	1	0	0	0	0	0	0	3350	10	10
1	26	165	94	75	19	27.5482	32	3	1	3	2	0	0	0	0	1	0	0	0	1	0	1	0	0	3130	10	10
1	26	164	90	72	18	26.7698	22	1	1	3	1	1	0	0	0	0	0	0	0	0	0	1	0	0	3520	10	10
1	29	170	108	86	22	29.7578	7	1	1	14	2	1	0	0	0	1	0	0	0	0	0	0	0	0	3480	10	10
1	33	163	78	68.5	9.5	25.7819	18	1	1	14	1	0	0	0	0	0	1	0	1	0	0	0	0	0	3560	10	10
1	34	170	90	65	25	22.4913	24	3	2	6	1	1	0	0	0	1	0	0	0	0	0	0	0	0	3310	10	10
1	38	165	95	70	25	25.7117	21	1	1	7	2	0	0	0	1	0	1	0	0	0	0	0	0	0	3630	10	10
1	26	163	71.5	53	18.5	19.9481	28	6	2	5	1	0	0	0	0	0	1	1	0	0	0	0	0	0	3380	10	10
1	26	167	75	55	20	19.721	16	1	1	7	2	0	0	0	0	1	0	0	0	0	0	0	0	1	3130	10	10
1	27	154	72	60	12	25.2994	32	3	2	4	2	0	0	0	0	0	1	0	0	0	0	0	0	0	3140	10	10
1	30	158	80	60	20	24.0346	28	3	2	6	1	1	0	0	0	0	0	0	0	0	0	0	0	0	3630	10	10
1	29	165	60	52	8	19.1001	37	2	1	3	1	0	0	0	0	1	0	0	0	0	0	0	0	0	3220	10	10
1	36	163	81	68	13	25.5937	32	1	1	5	1	1	0	0	0	0	0	0	0	0	0	0	0	0	2860	10	10
1	26	163	74	55	19	20.7008	33	1	1	5	1	0	0	0	0	0	0	0	0	0	0	0	0	0	3300	10	10
1	29	165	77	55	22	20.202	29	2	1	5	1	0	0	0	0	0	1	1	0	0	0	0	0	0	3790	10	10
1	29	167	60.5	45	15.5	16.1354	20	1	1	3	1	0	0	0	0	0	1	0	0	0	0	0	0	0	3290	10	10
1	27	160	69	56	13	21.875	30	1	1	4	1	0	0	0	0	0	0	0	0	0	0	0	0	0	2790	10	10
1	31	162	78	60	18	22.8624	31	2	1	7	1	1	0	1	0	0	0	0	0	0	0	0	0	0	1810	10	10
1	26	165	80	61	19	22.4059	32	2	2	3	2	0	0	0	0	1	0	0	1	0	0	1	0	0	2900	10	10
1	32	170	91	80	11	27.6817	34	1	1	6	1	1	0	0	0	1	0	0	0	0	0	0	0	0	2950	10	10
1	28	162	77	67.5	9.5	25.7202	25	2	2	2	1	0	0	0	0	0	0	0	0	0	0	0	0	0	3610	10	10
1	27	163	106	99	7	37.2615	25	1	1	3	1	0	0	0	0	0	0	0	0	0	0	1	0	0	3790	10	10
1	37	170	73	63	10	21.7993	20	3	2	2	1	0	0	0	0	0	0	0	0	0	0	0	0	0	3430	10	10
1	28	165	70	60	10	22.0386	21	3	2	5	1	0	0	0	0	0	0	1	0	0	0	0	0	0	2590	10	10
1	32	162	67	56	11	21.3382	29	1	1	5	1	0	0	0	0	0	0	0	0	0	0	0	0	0	3760	10	10
1	37	164	84	57	27	21.1927	24	2	1	4	1	0	0	0	0	1	0	0	0	0	0	0	0	0	3710	10	10
1	29	165	62.5	50	12.5	18.3655	37	1	1	4	1	0	0	0	0	0	0	0	0	0	0	1	0	1	2670	10	10
1	31	160	70	53	17	20.7031	32	4	2	6	1	0	0	0	1	0	0	0	0	0	0	0	0	0	4200	10	10
1	35	168	80	70	10	24.8016	26	2	2	6	1	0	0	0	0	0	1	0	0	0	0	0	0	1	2750	10	10
1	30	164	89	84	5	31.2314	27	1	1	5	1	1	0	0	0	1	0	0	0	0	0	0	0	0	2750	10	10
1	28	168	86	61	25	21.6128	28	2	1	5	1	0	0	0	0	0	0	0	0	0	0	0	0	0	3090	10	10
1	31	165	90	76	14	27.9155	26	2	2	3	2	0	0	0	0	1	1	0	0	1	0	1	0	0	3560	10	10
1	33	162	74	60	14	22.8624	29	2	2	5	1	0	0	0	0	1	0	0	0	0	0	0	0	0	3370	10	10
1	28	169	78	60	18	21.0077	28	3	1	3	1	0	0	0	0	0	1	1	0	0	0	0	0	0	3590	10	10
1	29	170	60	44	16	15.2249	20	4	2	14	1	0	0	0	0	1	0	0	0	0	0	0	0	0	2850	10	10
1	32	160	71	60	11	23.4375	25	3	2	6	1	0	0	0	0	1	0	0	0	1	0	0	0	0	3090	10	10
1	29	165	81.5	61.5	20	22.5895	21	5	2	5	1	0	0	0	0	1	1	0	0	0	0	0	0	0	2610	10	10
1	29	170	87	75	12	25.9516	20	1	1	3	1	0	0	0	0	0	0	0	0	1	0	1	0	0	3120	10	10
1	29	157	61.5	48	13.5	19.4734	25	3	1	5	2	0	0	0	1	1	0	0	0	0	0	0	0	0	4180	10	10
1	28	168	73	51	22	18.0697	24	3	1	2	1	1	0	0	0	0	1	0	0	0	1	0	0	0	3970	10	10
1	29	164	88	70	18	26.0262	30	3	2	2	1	0	0	0	0	0	0	0	0	0	0	0	0	0	3020	10	10
1	27	160	75	53	22	20.7031	28	1	1	5	1	0	0	0	0	0	1	0	0	1	0	0	0	1	3910	10	10
1	33	162	71	57	14	21.7193	33	1	1	5	1	0	0	1	0	0	0	0	0	0	0	0	0	0	2400	10	10
1	31	159	74.5	60	14.5	23.7332	28	1	1	5	1	1	0	0	0	0	1	0	0	0	0	0	0	0	3760	10	10
1	32	160	68	51	17	19.9219	33	1	1	4	1	0	0	0	0	0	0	0	0	0	0	0	0	0	3350	10	10
1	34	167	73	68	5	24.3824	24	1	1	5	1	0	0	0	0	0	0	0	0	0	0	1	0	0	3560	10	10
1	33	168	92	67	25	23.7387	28	1	1	5	1	0	0	0	0	1	0	0	0	0	0	0	0	0	3210	10	10
1	31	168	85	65	20	23.03	20	1	1	7	1	0	0	0	0	0	0	0	0	0	0	1	0	0	3000	10	10
1	30	163	83	75	8	28.2284	7	4	2	5	2	0	0	0	0	0	0	0	0	0	0	0	0	0	3860	10	10
1	27	168	68.5	52	16.5	18.424	28	1	1	4	2	0	0	0	0	0	0	0	0	1	0	0	0	0	3660	10	10
1	28	164	65	55	10	20.4491	32	1	1	4	1	1	0	0	0	0	0	0	0	0	0	0	0	0	3830	10	10
1	32	161	66	50	16	19.2894	28	3	2	4	2	0	0	0	0	0	0	0	0	0	0	0	0	0	3580	10	10
1	31	158	74.5	60	14.5	24.0346	34	1	1	5	1	0	0	0	0	0	0	1	0	0	0	1	0	0	3280	10	10
1	30	163	67	55	12	20.7008	28	7	2	5	2	0	0	0	0	0	0	0	0	0	0	0	0	0	2930	10	10
1	38	172	79	67.5	11.5	22.8164	28	1	1	5	1	0	0	0	0	0	0	0	0	0	0	0	0	0	3750	10	10
1	34	154	81.5	53.5	28	22.5586	30	2	1	5	2	1	0	0	0	1	0	0	0	0	0	0	0	0	3830	10	10
1	33	171	70.5	59	11.5	20.1771	36	1	1	4	1	1	0	0	0	0	1	0	0	0	0	0	1	0	2500	10	10
1	40	165	72.5	60	12.5	22.0386	12	2	2	5	1	0	0	0	1	0	0	0	0	0	0	0	0	0	4000	10	10
1	34	160	67	45	22	17.5781	33	5	1	5	2	0	0	0	0	0	0	0	0	0	1	0	0	0	3300	10	10
1	37	160	73	58	15	22.6562	34	4	1	5	1	0	0	0	0	0	1	0	0	0	0	0	1	0	3200	10	10
1	35	160	85	79	6	30.8594	16	5	2	5	2	0	0	0	0	0	0	0	0	0	0	0	0	1	2900	10	10
1	32	158	74	59	15	23.634	31	2	2	5	2	0	0	0	0	0	1	0	0	0	0	0	0	0	3500	10	10
1	39	165	74	68	6	24.977	31	3	2	5	2	0	0	0	0	0	1	0	0	0	0	0	0	0	3860	10	10
1	29	165	66.5	50	16.5	18.3655	24	1	1	5	2	0	0	0	0	0	0	0	0	0	0	0	0	1	2520	10	10
1	29	162	73	57.5	15.5	21.9098	16	1	1	5	2	0	0	0	0	0	1	0	0	0	0	0	0	1	3010	10	10
1	25	158	64	41	23	16.4237	36	3	1	4	1	0	0	0	0	0	0	0	0	0	0	0	0	0	3120	10	10
1	25	156	62	50	12	20.5457	32	1	1	5	2	0	0	0	1	0	1	0	0	0	0	0	0	0	4320	10	10
1	29	170	74	62	12	21.4533	32	2	1	6	1	0	0	0	1	0	1	0	0	0	0	0	0	0	4160	10	10
1	27	165	85	67	18	24.6097	34	1	1	6	1	0	0	0	0	0	1	0	0	0	0	0	0	0	3120	10	10
1	29	160	79	65	14	25.3906	25	2	1	5	1	1	0	0	0	0	0	0	0	0	0	0	0	0	3030	10	10
1	25	160	82	62	20	24.2188	34	1	1	5	2	1	0	0	0	0	0	1	0	0	0	0	0	0	3530	10	10
1	31	158	66.5	50	16.5	20.0288	30	2	1	8	1	0	0	0	0	0	0	0	1	0	0	0	0	0	3010	10	10
1	34	162	83.5	70	13.5	26.6728	36	2	2	2	1	1	0	0	1	1	0	0	0	0	0	0	0	0	4130	10	10
1	41	156	75.5	62	13.5	25.4767	36	4	2	4	1	0	0	0	0	0	0	0	0	0	0	1	0	0	2970	10	10
1	27	170	69	60	9	20.7612	27	2	1	7	1	0	0	0	0	1	0	0	0	0	0	0	0	0	3100	10	10
1	30	172	82	63	19	21.2953	20	2	2	5	2	0	0	0	0	0	0	0	0	0	0	0	0	1	2740	10	10
1	27	162	67	60	7	22.8624	29	1	1	6	1	0	0	0	0	1	0	0	0	0	0	0	0	0	3120	10	10
1	30	162	73	63	10	24.0055	24	2	2	4	1	0	0	0	1	1	1	0	0	0	0	0	0	1	4000	10	10
0	43	165	85	70	15	25.7117		3	2	5	2	0	0	0	0	1	0	0	0	1	0	0	0	0	3670	10	10
0	35	164	83	70	13	26.0262		1	1	8	1	0	0	0	0	1	1	0	0	1	0	0	0	0	3180	10	10
0	36	163	86	66	20	24.841		3	2	9	2	0	0	0	0	1	0	0	0	0	0	0	0	0	3920	10	10
0	27	162	81	61	20	23.2434		1	1	9	1	0	0	0	0	0	1	0	1	0	0	0	0	1	3100	10	10
0	44	163	70	54	16	20.3244		2	1	9	2	0	0	0	0	0	1	0	0	0	0	0	0	0	3360	10	10
0	30	165	84	75	9	27.5482		3	1	11	2	0	0	0	1	1	0	0	0	0	0	0	0	0	4220	10	10
0	40	158	80	67	13	26.8386		1	1	9	1	0	0	0	0	1	0	0	0	1	0	0	0	0	3660	10	10
0	27	164	67	50	17	18.5901		3	2	6	1	0	0	0	0	1	0	0	0	0	0	0	0	0	3780	10	10
0	27	158	71	65.5	5.5	26.2378		3	2	5	1	0	0	0	0	1	1	0	0	1	0	0	0	0	3310	10	10
0	26	163	90	65	25	24.4646		1	1	7	2	0	0	0	0	0	1	0	0	1	0	0	0	0	3170	10	10
0	44	165	63	54	9	19.8347		3	1	10	2	0	0	1	0	1	0	1	1	1	0	0	0	1	1490	10	10
0	37	156	75	64	11	26.2985		4	2	7	1	0	0	0	0	1	0	0	0	0	0	0	0	0	3800	10	10
0	40	174	78	69	9	22.7903		2	2	4	1	0	0	0	0	1	1	0	0	0	0	0	0	0	4180	10	10
0	36	158	83	63	20	25.2363		1	1	5	1	1	0	0	0	1	1	0	0	0	0	0	0	0	3480	10	10
0	33	158	75	60	15	24.0346		2	1	8	2	0	0	0	1	1		0	0	0	0	0	0	0	4350	10	10
0	34	163	90	64	26	24.0882		2	1	8	2	0	0	0	0	1	1	0	0	0	0	0	0	0	3260	10	10
0	36	162	75	62	13	23.6244		1	1	5	1	0	0	0	0	1	1	0	0	0	0	0	0	1	3130	10	10
0	29	170	70	55	15	19.0311		1	1	4	1	0	0	0	0	1	0	0	0	0	0	0	0	0	2700	10	10
0	26	166	86	67	19	24.3141		1	1	9	2	0	0	0	0	1	0	0	0	0	0	0	0	0	4210	10	10
0	25	163	75	60	15	22.5827		4	2	7	2	0	0	0	0	1	0	0	0	0	0	0	0	0	3830	10	10
0	30	163	86	71	15	26.7229		1	1	11	1	0	0	0	0	1	1	0	0	0	0	0	0	0	3960	10	10
0	27	155	64	54	10	22.4766		2	2	9	2	0	0	0	0	0	1	0	0	0	1	0	0	0	3300	10	10
0	30	160	59	44	15	17.1875		1	1	8	2	0	0	0	0	0	0	0	1	0	0	0	0	0	3480	9	10
0	30	165	78	60	18	22.0386		1	1	5	1	0	0	0	0	1	0	0	0	0	0	0	0	0	3550	10	10
0	41	168	67	49	18	17.3611		6	1	5	2	0	0	0	0	1	0	0	0	0	0	1	0	0	4020	10	10
0	28	160	81	75	6	29.2969		3	2	8	2	0	0	0	0	1	0	0	0	1	0	0	0	0	3170	10	10
0	28	160	67	43	24	16.7969		1	1	6	2	0	0	0	0	1	0	0	0	0	0	0	0	0	4050	8	10
0	28	171	84	68	16	23.255		4	1	5	1	1	0	0	0	0	1	0	0	1	0	0	0	0	3500	10	10
0	30	160	82	70	12	27.3438		2	1	5	2	0	0	1	0	1	0	0	0	1	0	0	0	0	2840	10	10
0	29	160	55	43	12	16.7969		3	1	10	1	0	0	0	0	1	0	0	0	0	0	0	0	0	2920	10	10
0	29	168	95	82	13	29.0533		2	2	4	2	0	0	0	0	1	0	0	0	0	0	0	0	0	3360	10	10
0	29	150	75	60	15	26.6667		1	1	7	2	1	0	0	0	0	0	0	0	0	0	1	0	0	3400	10	10
0	29	165	73	60	13	22.0386		2	1	4	1	0	0	0	0	0	0	0	0	0	0	0	0	0	3610	10	10
0	28	160	52	40	12	15.625		1	1	6	1	0	0	0	0	1	1	1	0	0	0	0	0	0	2720	10	10
0	25	170	76	54	22	18.6851		1	1	4	1	0	0	0	0	0	0	0	0	0	0	0	0	0	3340	10	10
0	30	158	91	71	20	28.441		1	1	7	2	1	0	0	0	0	0	1	0	0	0	0	0	1	3300	10	10
0	39	157	88	65	23	26.3702		3	2	6	2	0	0	0	0	0	0	0	0	1	0	1	0	0	3550	10	10
0	27	166	85	60	25	21.7738		1	1	8	2	0	0	0	1	1	0	0	0	0	0	0	0	0	4700	10	10
0	30	160	63	48	15	18.75		1	1	5	1	0	0	0	0	1	0	0	0	0	0	0	0	0	3510	10	10
0	30	164	92	72	20	26.7698		1	1	6	2	0	0	0	1	0	1	0	0	0	0	0	0	0	4540	10	10
0	42	159	93	75	18	29.6665		4	2	5	1	0	0	0	0	1	0	0	0	0	0	0	0	0	3130	10	10
0	37	175	103	80	23	26.1224		1	1	10	2	0	0	0	0	0	1	0	1	0	0	0	0	0	3490	10	10
0	31	163	56	43	13	16.1843		1	1	6	1	0	0	0	0	1	1	0	0	0	0	1	0	1	2780	10	10
0	27	163	73	50	23	18.8189		1	1	3	1	1	0	0	0	0	0	0	1	0	0	0	0	0	2720	10	10
0	25	167	68	53	15	19.0039		2	1	3	1	0	0	0	0	0	0	0	0	0	0	0	0	0	3190	10	10
0	28	163	79	65	14	24.4646		2	1	11	2	0	0	0	0	1	0	0	0	1	0	0	0	0	3640	10	10
0	28	161	65	48	17	18.5178		1	1	9	2	0	0	0	0	0	0	0	0	0	0	1	0	0	3030	10	10
0	34	160	68	55	13	21.4844		3	2	5	2	0	0	0	0	1	1	0	0	0	0	0	0	0	3410	10	10
0	28	160	75	49	26	19.1406		2	1	5	1	0	0	0	0	0	0	0	0	1	0	0	0	0	3710	10	10
0	31	163	85	62	23	23.3355		1	1	10	2	1	0	0	1	0	0	1	0	0	0	1	0	0	4000	7	8
0	28	160	90	79	11	30.8594		3	1	13	2	0	0	1	0	0	0	0	1	0	0	1	0	0	1200	5	7
0	32	158	65	46	19	18.4265		2	1	8	2	0	0	0	0	0	1	0	0	0	0	0	0	0	3910	10	10
0	32	157	71	55	16	22.3133		1	1	5	1	0	0	0	0	1	0	0	0	0	0	0	0	0	2920	10	10
0	29	155	71	55	16	22.8928		1	1	4	1	0	0	0	0	0	0	0	0	0	0	0	0	0	3800	10	10
0	28	167	76	57	19	20.4382		2	1	4	1	1	0	0	0	0	0	0	0	0	0	1	0	0	3700	10	10
0	31	170	92	68	24	23.5294		2	1	8	2	0	0	0	0	0	0	0	0	0	0	1	0	0	3670	10	10
0	30	165	82	65	17	23.8751		2	2	5	1	1	0	0	0	0	1	0	0	0	0	0	0	0	3500	10	10
0	33	164	67	60	7	22.3081		2	2	3	1	0	0	0	0	1	1	0	0	0	0	0	0	0	2150	10	10
0	34	162	84	60	24	22.8624		1	1	5	1	0	0	0	0	0	0	0	0	0	0	0	0	0	3660	10	10
0	33	158	60	45	15	18.026		1	1	6	2	1	0	0	0	0	0	1	1	0	1	1	0	0	3050	10	10
0	26	151	59	50	9	21.9289		1	1	6	1	0	0	0	0	1	1	0	0	0	0	0	0	0	2950	10	10
0	26	165	83	60	23	22.0386		1	1	7	1	0	0	0	0	0	0	0	0	1	0	0	0	0	3130	10	10
0	29	161	95	88	7	33.9493		1	1	6	1	0	0	0	1	0	1	0	0	0	0	1	0	1	4340	10	10
0	26	160	64	55	9	21.4844		2	1	3	1	1	0	1	0	1	0	0	0	0	0	0	0	0	2070	10	10
0	28	166	82	64	18	23.2254		1	1	7	1	0	0	0	0	0	0	0	0	1	0	0	0	0	3560	10	10
0	27	155	74	67	7	27.8876		1	1	8	1	0	0	0	0	1	0	0	0	0	0	0	0	0	3030	10	10
0	27	170	80	55	25	19.0311		2	1	4	1	0	0	0	0	0	0	0	0	0	0	1	0	0	3280	10	10
0	30	160	72	54	18	21.0938		2	2	6	2	0	0	0	1	0	0	0	0	0	0	0	0	0	4150	10	10
0	29	158	69	49	20	19.6283		1	1	5	1	0	0	0	0	0	1	0	0	0	0	0	0	0	3350	10	10
0	32	157	61	53	8	21.5019		1	1	11	2	0	0	0	0	0	1	0	0	0	0	0	0	0	2890	10	10
0	33	162	66	60	6	22.8624		2	2	7	2	0	0	0	0	1	0	0	0	0	0	1	0	0	3080	10	10
0	28	162	75	65	10	24.7676		2	1	5	1	0	0	0	0	1	0	0	0	0	0	0	0	0	3100	10	10
0	30	168	69	56	13	19.8413		4	2	4	1	1	0	0	0	0	0	0	0	0	0	0	0	0	3200	10	10
0	33	167	82	74	8	26.5338		4	1	7	2	0	0	0	0	1	0	0	0	1	0	0	0	0	3020	10	10
0	33	173	78	68	10	22.7204		3	2	3	1	0	0	0	0	1	0	0	0	0	0	0	0	0	3630	10	10
0	37	162	74	62	12	23.6244		2	1	3	1	0	0	0	0	1	0	0	0	0	0	0	0	0	3130	10	10
0	29	172	103	83	20	28.0557		1	1	5	1	0	0	0	0	0	0	0	0	1	0	0	0	0	3520	10	10
0	33	154	54	46	8	19.3962		1	1	5	1	1	0	0	0	0	0	1	0	0	0	0	0	0	2870	10	10
0	24	165	87	67	20	24.6097		1	1	4	1	1	0	0	0	0	0	0	0	1	0	0	0	0	3410	10	10
0	27	165	71	62	9	22.7732		2	1	4	1	0	0	0	0	0	0	0	0	0	0	0	0	0	3460	10	10
0	36	155	93	81	12	33.7149		1	1	5	1	0	0	0	0	1	0	1	0	1	0	0	0	0	2820	3	6
0	25	163	76	60	16	22.5827		2	1	5	2	0	0	0	0	0	1	0	0	0	0	1	0	0	3640	10	10
0	37	165	80	60	20	22.0386		3	2	6	2	0	0	0	1	1	0	0	0	0	0	0	0	0	4710	10	10
0	30	158	63	45	18	18.026		3	1	5	1	0	0	0	0	0	0	0	0	0	0	0	0	0	3750	10	10
0	29	162	68	53	15	20.1951		1	1	7	1	0	0	0	0	1	0	0	0	1	0	0	0	0	3670	10	10
0	28	157	63	48	15	19.4734		1	1	8	2	0	0	0	0	1	0	0	0	0	0	0	0	0	3590	10	10
0	34	171	80	57	23	19.4932		3	2	6	2	0	0	0	0	1	1	0	0	0	0	0	0	0	3800	10	10
0	27	168	78	64	14	22.6757		1	1	6	1	0	0	0	0	1	1	0	0	0	0	0	0	0	3500	10	10
0	32	160	77	63	14	24.6094		2	1	5	1	1	0	0	0	1	0	0	0	1	0	0	0	0	3370	10	10
0	28	165	78	55	23	20.202		2	1	5	1	0	0	0	0	0	1	0	0	0	0	0	0	0	3450	10	10
0	28	158	72	55	17	22.0317		1	1	4	1	1	0	0	0	0	0	0	0	1	0	1	0	0	3520	10	10
0	30	160	69	57	12	22.2656		4	2	5	2	0	0	0	0	0	0	0	0	0	0	0	0	1	3390	10	10
0	26	168	93	73	20	25.8645		1	1	8	2	0	0	1	0	1	0	0	1	0	0	1	0	0	2770	10	10
0	34	163	64	47	17	17.6898		1	1	4	1	0	0	0	0	1	0	0	0	0	0	1	0	0	3580	10	10
0	26	173	94	70	24	23.3887		1	1	6	1	0	0	0	1	1	0	0	0	0	0	1	0	0	4420	10	10
0	24	165	75	55	20	20.202		1	1	5	1	1	0	0	0	1	0	0	0	0	0	1	0	0	3680	10	10
0	23	164	64	44	20	16.3593		1	1	5	1	0	0	0	0	0	0	0	0	0	0	1	0	1	3670	10	10
0	33	166	71	57	14	20.6852		3	1	4	1	1	0	0	0	0	0	0	0	0	0	0	0	0	2800	10	10
0	37	160	73	58	15	22.6562		3	2	7	2	0	0	0	0	1	1	0	0	0	0	0	0	0	3830	10	10
0	31	156	59	44	15	18.0802		1	1	6	1	0	0	0	0	1	0	0	0	0	0	0	0	0	3120	10	10
0	34	155	94	69	25	28.7201		3	1	8	2	0	0	0	0	1	0	0	1	1	0	1	0	1	3160	10	10
0	29	158	71	62	9	24.8358		1	1	5	1	0	0	0	0	1	1	0	0	0	0	1	0	1	3630	10	10
0	25	157	75	60	15	24.3418		1	1	6	2	0	0	0	0	0	1	0	0	1	0	1	0	0	3600	10	10
0	28	161	70	52	18	20.061		2	1	5	1	0	0	0	0	0	1	0	1	0	0	0	0	0	3730	9	10
0	20	165	70	53	17	19.4674		1	1	6	2	1	0	0	1	0	0	1	0	0	0	1	0	0	4520	10	10
0	30	170	89	65	24	22.4913		1	1	5	1	0	0	0	0	1	0	0	0	1	0	0	0	0	3450	10	10
0	29	162	59	45	14	17.1468		1	1	3	1	1	0	0	0	0	0	0	0	0	0	1	0	0	3020	10	10
0	32	163	99	84	15	31.6158		2	2	6	1	0	0	0	0	1	1	0	0	0	0	0	0	0	4000	10	10
0	29	164	80	61	19	22.68		2	1	4	1	0	0	0	1	0	0	0	0	0	0	1	0	0	4080	10	10
0	34	160	80	65	15	25.3906		2	1	17	1	0	0	0	0	0	0	0	1	0	0	0	0	0	2700	10	10
0	26	165	63	53	10	19.4674		2	2	4	1	0	0	0	0	0	0	0	0	0	0	1	0	0	3210	10	10
0	29	160	67	53	14	20.7031		5	2	7	1	0	0	0	0	1	0	0	0	0	0	0	0	0	2850	10	10
0	25	163	66	51	15	19.1953		1	1	5	1	0	0	0	0	1	0	0	0	0	0	0	0	0	3460	10	10
0	23	172	90	88	2	29.7458		2	1	3	1	1	0	0	0	0	0	0	0	0	0	0	0	0	3990	10	7
0	33	168	76	62	14	21.9671		2	2	6	2	1	0	0	0	1	0	0	0	0	0	0	0	0	3680	10	10
0	38	160	76	62	14	24.2188		4	2	6	2	0	0	0	0	1	0	0	0	1	0	0	0	0	2920	10	10
0	27	155	85	63	22	26.2227		2	1	4	1	1	0	0	0	0	1	0	0	0	0	1	0	0	3650	10	10
0	29	170	72	60	12	20.7612		1	1	4	1	0	0	0	0	1	0	0	0	0	0	0	0	0	3390	10	10
0	34	162	92	78	14	29.7211		2	1	4	1	0	0	0	0	1	1	0	0	1	0	0	0	0	3950	10	10
0	37	166	84	67	17	24.3141		1	1	14	1	0	0	0	0	1	0	0	0	0	0	0	0	0	3100	10	10
0	20	162	70	57	13	21.7193		1	1	4	1	0	0	0	0	0	0	0	0	0	0	0	0	0	3260	10	10
0	30	160	77	60	17	23.4375		1	1	4	1	0	0	0	0	1	0	0	0	0	0	1	0	0	3180	10	10
0	25	165	67	57	10	20.9366		1	1	5	1	0	0	0	0	1	0	0	0	0	0	1	0	0	3320	10	10
0	29	160	58	43	15	16.7969		2	1	5	1	0	0	0	0	1	0	0	0	0	0	0	0	0	2880	10	10
0	29	168	71	55	16	19.487		1	1	5	1	1	0	0	0	1	0	0	0	0	0	0	0	0	2830	10	10
0	29	156	74	60	14	24.6548		1	1	5	1	0	0	0	0	1	0	0	0	0	0	0	0	0	3170	10	10
0	28	164	63	50	13	18.5901		1	1	6	1	0	0	0	0	1	0	0	0	0	0	0	0	0	3210	10	10
0	31	170	82	65	17	22.4913		3	1	5	2	0	0	0	1	0	0	0	1	0	0	0	0	0	4220	10	10
0	30	165	91	60	31	22.0386		1	1	7	2	0	0	0	0	0	0	0	1	0	0	0	0	0	3360	10	10
0	33	155	60	50	10	20.8117		3	2	5	1	0	1	0	0	1	1	0	0	0	0	0	0	0	3390	3	8
0	25	165	79	57	22	20.9366		3	2	4	1	0	0	0	1	1	1	0	0	0	0	0	0	0	4600	10	10
0	28	155	64	49	15	20.3954		1	1	4	1	0	0	0	0	1	0	0	0	0	0	1	0	0	2650	10	10
0	28	160	64	53	11	20.7031		2	1	7	1	0	0	0	0	1	0	0	0	0	0	1	0	0	3870	10	10
0	27	158	70	56	14	22.4323		2	1	5	1	1	0	0	0	0	0	0	0	0	0	0	0	0	3000	10	10
0	27	160	70	58	12	22.6562		3	1	8	2	0	0	0	0	1	1	0	0	0	0	1	0	0	3560	10	10
0	26	163	62	44	18	16.5607		1	1	4	1	0	0	0	0	1	0	0	1	0	0	0	0	0	2660	10	10
0	41	163	64	49	15	18.4425		3	2	4	1	0	0	0	0	0	0	0	0	0	0	0	0	0	3770	10	10
0	27	155	70	59	11	24.5578		1	1	4	2	0	0	0	0	0	0	1	0	0	0	1	0	0	3560	10	10
0	33	158	65	57	8	22.8329		4	2	10	1	0	0	0	0	1	0	0	0	0	0	0	0	0	3490	10	10
0	36	160	69	57	12	22.2656		3	2	5	1	0	0	0	0	1	1	0	0	0	0	0	0	0	3770	10	10
0	37	165	85	69	16	25.3444		3	2	6	2	0	0	0	0	1	0	0	0	0	0	0	0	0	3170	10	10
0	25	160	95	87	8	33.9844		4	2	5	2	0	0	0	0	1	0	0	0	0	0	0	0	0	3990	10	10
0	36	164	97	83	14	30.8596		4	2	5	1	0	0	0	0	1	0	0	0	0	0	0	0	0	3430	10	10
0	27	165	72	55	17	20.202		1	1	7	1	0	0	0	0	0	0	0	0	0	0	1	0	0	3590	10	10
0	33	166	65	59	6	21.4109		5	2	4	1	0	0	1	0	1	1	0	0	0	0	1	0	0	3320	10	10
0	28	165	89	72	17	26.4463		2	2	4	1	0	0	0	1	1	0	0	0	0	0	0	0	0	4040	10	10
0	26	160	61	46	15	17.9688		2	1	6	1	0	0	0	0	0	0	0	0	0	0	1	0	0	3090	10	10
0	33	157	67	51	16	20.6905		1	1	7	1	0	0	0	0	1	0	0	0	0	0	0	0	0	3970	10	10
0	24	164	67	58	9	21.5645		1	1	6	1	0	0	0	0	1	0	0	0	0	0	0	0	0	3420	10	10
0	27	167	70	50	20	17.9282		1	1	6	1	0	0	0	0	0	0	0	0	0	0	1	0	0	3150	10	10
0	28	158	68	53	15	21.2306		1	1	5	1	0	0	0	0	0	0	0	0	0	0	1	0	0	3540	10	10
0	32	160	78	69	9	26.9531		1	1	4	1	0	0	0	0	1	0	0	0	0	0	1	0	1	3380	10	10
0	34	165	68	51	17	18.7328		2	2	6	2	0	0	0	0	0	1	0	0	0	0	0	0	0	3200	10	10
0	33	162	84	69	15	26.2917		4	2	6	2	0	0	0	0	0	0	0	0	0	0	1	0	0	3960	10	10
0	26	162	83	65	18	24.7676		1	1	6	1	0	0	0	0	1	0	0	0	0	0	0	0	0	3940	10	10
0	22	160	70	52	18	20.3125		2	1	6	1	0	0	0	0	1	1	0	0	0	0	1	0	0	3750	10	10
0	29	134	73	62	11	34.5288		1	1	6	1	0	0	0	0	1	0	0	0	0	0	1	0	0	2930	10	10
0	30	160	71	62	9	24.2188		2	1	5	1	0	0	0	0	1	0	0	0	0	0	0	0	0	3410	10	10
0	30	165	68	54	14	19.8347		2	2	5	2	0	0	0	0	1	0	0	0	0	0	0	0	0	3670	10	10
0	26	160	78	69	9	26.9531		1	1	6	2	0	0	0	0	1	0	0	0	0	0	0	0	0	3620	10	10
0	29	155	60	48	12	19.9792		3	1	8	1	1	0	0	0	0	1	1	0	0	0	1	0	0	3240	9	9
0	31	155	62	51	11	21.2279		2	2	5	2	0	0	0	0	1	0	0	0	0	0	0	0	0	3420	10	10
0	34	165	81	63	18	23.1405		1	1	4	1	0	0	0	0	0	1	0	0	1	0	0	0	0	3130	10	10
0	24	173	69	60	9	20.0474		1	1	6	1	0	0	0	0	1	0	0	0	0	0	0	0	0	3100	10	10
0	30	163	70	58	12	21.83		4	2	4	1	0	0	0	0	0	0	0	0	0	0	1	0	1	3210	10	10
0	29	161	80	64	16	24.6904		1	1	5	1	0	0	0	0	0	0	0	0	0	0	1	0	0	3010	10	10
0	28	155	61	44	17	18.3143		1	1	3	1	0	0	0	0	0	0	0	0	0	0	0	0	1	3100	10	10
0	29	158	63	52	11	20.83		1	1	4	1	1	0	0	0	0	0	0	0	0	0	1	0	0	3380	10	10
0	27	170	93	80	13	27.6817		1	1	4	1	0	0	0	0	1	0	0	0	0	0	0	0	0	2990	10	10
0	24	136	76	57	19	30.8175		2	1	4	1	1	0	0	0	0	0	0	0	0	0	1	0	1	3100	10	10
0	31	163	70	51	19	19.1953		1	1	4	1	0	0	0	0	1	0	0	0	0	0	0	0	0	2800	10	10
0	31	163	69	52	17	19.5717		1	1	3	1	1	0	0	0	0	0	0	0	0	0	1	0	0	3060	10	10
0	31	162	72	54	18	20.5761		1	1	3	1	0	0	0	0	1	1	0	0	0	0	0	0	0	4170	10	10
0	27	161	71	57	14	21.9899		1	1	3	1	0	0	0	0	1	0	1	1	0	1	1	0	0	2370	10	10
0	33	162	76	64	12	24.3865		2	2	5	2	1	0	0	0	0	0	0	0	0	0	0	0	0	3910	10	10
0	33	158	78	60	18	24.0346		5	2	5	2	0	0	0	0	0	0	0	1	1	0	0	0	0	2460	10	10
0	33	165	85	65	20	23.8751		1	1	12	1	0	0	0	0	0	0	0	0	0	0	0	0	0	3260	10	10
0	29	160	74	58	16	22.6562		4	3	4	2	1	0	0	0	0	0	0	0	0	0	0	0	0	3650	10	10
0	28	160	63	52	11	20.3125		1	1	5	1	0	0	0	0	0	0	0	0	0	0	0	0	0	3090	10	10
0	31	155	67	62	5	25.8065		1	1	3	1	0	0	0	0	0	0	0	0	0	0	0	0	0	3000	10	10
0	29	165	97	78	19	28.6501		1	1	8	2	1	0	0	0	0	0	0	0	0	0	0	0	0	2800	10	10
0	27	164	61	45	16	16.7311		2	1	6	1	0	0	0	0	0	0	0	0	0	0	0	0	0	3170	10	10
0	28	169	69	51	18	17.8565		1	1	3	1	1	0	0	0	0	0	0	0	0	0	0	0	0	3600	10	10
0	28	162	63	52	11	19.8141		1	1	6	2	0	0	0	0	1	0	0	0	0	0	0	0	0	3700	10	10
0	27	170	70	50	20	17.301		5	1	5	1	0	0	0	0	1	0	0	0	1	0	0	0	0	2910	10	10
0	28	163	74	62	12	23.3355		1	1	6	1	0	0	0	0	1	0	0	0	0	0	0	0	0	3220	10	10
0	30	167	80	59	21	21.1553		3	1	4	1	0	0	0	0	0	0	0	0	0	0	0	0	0	3570	10	10
0	30	158	103	87	16	34.8502		2	2	7	1	0	0	0	0	0	0	0	0	1	0	0	0	0	3880	10	10
0	31	160	78	69	9	26.9531		2	2	6	3	0	1	0	0	0	0	1	0	0	0	0	0	0	3440	6	10
0	30	160	71	62	9	24.2188		1	1	5	1	0	0	0	0	0	0	0	0	0	0	0	0	1	3020	10	10
0	30	156	67	58	9	23.833		2	2	5	2	0	0	0	0	1	0	0	0	0	0	0	0	0	3480	10	10
0	27	165	75	60	15	22.0386		1	1	5	2	0	0	0	0	0	0	0	0	0	0	0	0	1	2940	10	10
0	32	160	87	79	8	30.8594		1	1	4	1	1	0	0	0	1	0	0	0	0	0	0	0	0	2690	10	10
0	29	165	75	60	15	22.0386		1	1	7	2	1	0	0	0	0	1	0	0	0	0	0	0	0	3500	10	10
0	28	168	88	70	18	24.8016		1	1	4	1	0	0	0	0	1	0	0	0	0	0	0	0	0	3770	10	10
0	27	159	63	51	12	20.1733		1	1	6	2	1	0	0	0	0	0	0	0	0	0	0	0	0	3350	10	10
0	26	160	74	57	17	22.2656		1	1	3	1	0	0	0	0	1	0	0	0	0	0	0	0	0	3280	10	10
0	33	160	80	70	10	27.3438		2	1	6	1	0	0	0	0	1	0	0	1	0	0	0	0	0	2460	10	10
0	26	167	69	58	11	20.7967		1	1	5	1	0	0	0	0	0	0	0	0	0	0	0	0	0	3240	10	10
0	36	158	89	64	25	25.6369		2	2	5	1	0	0	0	0	0	0	0	1	0	0	0	0	0	2910	9	10
0	29	64	85	72	13	175.781		1	1	6	1	0	0	0	0	1	0	0	0	0	0	0	0	0	3230	10	10
0	32	161	58	52	6	20.061		1	1	5	1	0	0	0	0	1	0	0	0	0	0	0	0	0	2730	10	10
0	28	154	63	54	9	22.7694		2	2	4	1	0	0	1	0	0	0	0	0	0	0	0	0	0	3110	10	9
0	29	160	69	55	14	21.4844		3	2	2	1	1	0	0	0	0	0	0	0	0	0	0	0	1	3550	10	10
0	29	158	56	42	14	16.8242		1	1	5	1	0	0	0	0	0	0	0	0	0	0	0	0	1	3060	10	10
0	26	155	61	48	13	19.9792		2	1	3	1	0	0	0	0	0	0	0	0	0	0	0	0	0	3060	10	10
0	33	162	77	59	18	22.4813		3	2	4	2	0	0	0	1	1	0	0	0	0	0	0	0	1	4100	10	10
0	33	162	85	77	8	29.34		4	2	4	2	0	0	0	0	1	0	0	0	0	0	0	0	0	3050	10	10
0	30	164	72	58	14	21.5645		3	1	5	1	0	0	0	0	0	0	0	0	0	0	0	0	0	3160	10	10
